# Supplementary material
Source: HighWire-hosted journal article supplement (https://bmjopen.bmj.com/content/13/4/e062135)
Supplement: inline-supplementary-material-1 [file inline-supplementary-material-1.pdf]

**Database: Ovid MEDLINE(R) and Epub Ahead of Print, In-Process, In-Data-Review & Other  
Non-Indexed Citations and Daily (1946 to March 09, 2022)**

| #  | Searches                                                                                                                                                                                                                                                                                                                                                          | Results |
|----|-------------------------------------------------------------------------------------------------------------------------------------------------------------------------------------------------------------------------------------------------------------------------------------------------------------------------------------------------------------------|---------|
| 1  | exp Mycobacterium tuberculosis/                                                                                                                                                                                                                                                                                                                                   | 56893   |
| 2  | (Mycobacterium tuberculosis or MTB or mycobacterium tuberculosis complex).mp. [mp=title, abstract, original title, name of substance word, subject heading word, floating sub-heading word, keyword heading word, organism supplementary concept word, protocol supplementary concept word, rare disease supplementary concept word, unique identifier, synonyms] | 76134   |
| 3  | exp Tuberculosis/                                                                                                                                                                                                                                                                                                                                                 | 204979  |
| 4  | exp Tuberculosis, Pulmonary/                                                                                                                                                                                                                                                                                                                                      | 77546   |
| 5  | (TB or PTB or pulmonary tuberculosis or lung tuberculosis).mp. [mp=title, abstract, original title, name of substance word, subject heading word, floating sub-heading word, keyword heading word, organism supplementary concept word, protocol supplementary concept word, rare disease supplementary concept word, unique identifier, synonyms]                | 106486  |
| 6  | 1 or 2 or 3 or 4 or 5                                                                                                                                                                                                                                                                                                                                             | 276944  |
| 7  | exp Adult/                                                                                                                                                                                                                                                                                                                                                        | 7902127 |
| 8  | exp Aged/                                                                                                                                                                                                                                                                                                                                                         | 3439008 |
| 9  | exp "Aged, 80 and over"/                                                                                                                                                                                                                                                                                                                                          | 1012459 |
| 10 | exp Middle Aged/                                                                                                                                                                                                                                                                                                                                                  | 4710681 |

|    |                                                                                                                                                                                                                                                                                                                                                               |         |
|----|---------------------------------------------------------------------------------------------------------------------------------------------------------------------------------------------------------------------------------------------------------------------------------------------------------------------------------------------------------------|---------|
| 11 | (aged or elder* or adult*).mp. [mp=title, abstract, original title, name of substance word, subject heading word, floating sub-heading word, keyword heading word, organism supplementary concept word, protocol supplementary concept word, rare disease supplementary concept word, unique identifier, synonyms]                                            | 8946855 |
| 12 | 7 or 8 or 9 or 10 or 11                                                                                                                                                                                                                                                                                                                                       | 8946860 |
| 13 | exp Feces/                                                                                                                                                                                                                                                                                                                                                    | 107456  |
| 14 | (stool or f?eces or f?ecal).mp. [mp=title, abstract, original title, name of substance word, subject heading word, floating sub-heading word, keyword heading word, organism supplementary concept word, protocol supplementary concept word, rare disease supplementary concept word, unique identifier, synonyms]                                           | 210628  |
| 15 | ((stool or f?eces or f?ecal) adj3 (analysis or sample* or specimen*)).mp. [mp=title, abstract, original title, name of substance word, subject heading word, floating sub-heading word, keyword heading word, organism supplementary concept word, protocol supplementary concept word, rare disease supplementary concept word, unique identifier, synonyms] | 48531   |
| 16 | 13 or 14 or 15                                                                                                                                                                                                                                                                                                                                                | 216070  |
| 17 | exp Diagnosis/                                                                                                                                                                                                                                                                                                                                                | 9296766 |
| 18 | exp "Diagnostic Techniques and Procedures"/                                                                                                                                                                                                                                                                                                                   | 7828075 |
| 19 | exp "Sensitivity and Specificity"/                                                                                                                                                                                                                                                                                                                            | 644623  |
| 20 | diagnos*.mp.                                                                                                                                                                                                                                                                                                                                                  | 5839263 |

|    |                                                                                                                                                                                                                                                                                                                                   |          |
|----|-----------------------------------------------------------------------------------------------------------------------------------------------------------------------------------------------------------------------------------------------------------------------------------------------------------------------------------|----------|
| 21 | (diagnos* adj3 (accuracy or performance)).mp. [mp=title, abstract, original title, name of substance word, subject heading word, floating sub-heading word, keyword heading word, organism supplementary concept word, protocol supplementary concept word, rare disease supplementary concept word, unique identifier, synonyms] | 93653    |
| 22 | 17 or 18 or 19 or 20 or 21                                                                                                                                                                                                                                                                                                        | 11692041 |
| 23 | 6 and 12 and 16 and 22                                                                                                                                                                                                                                                                                                            | 254      |

**Database: Embase Classic+Embase (1947 to March 9, 2022)**

| # | Searches                                                                                                                                                                                                                                                             | Results |
|---|----------------------------------------------------------------------------------------------------------------------------------------------------------------------------------------------------------------------------------------------------------------------|---------|
| 1 | exp Mycobacterium tuberculosis/                                                                                                                                                                                                                                      | 85907   |
| 2 | (Mycobacterium tuberculosis or MTB or mycobacterium tuberculosis complex).mp. [mp=title, abstract, heading word, drug trade name, original title, device manufacturer, drug manufacturer, device trade name, keyword, floating subheading word, candidate term word] | 108425  |
| 3 | exp Tuberculosis/                                                                                                                                                                                                                                                    | 296667  |
| 4 | exp Tuberculosis, Pulmonary/                                                                                                                                                                                                                                         | 81940   |
| 5 | (TB or PTB or pulmonary tuberculosis or lung tuberculosis).mp. [mp=title, abstract, heading word, drug trade name, original title, device manufacturer, drug manufacturer, device trade name, keyword, floating subheading word, candidate term word]                | 191949  |

|    |                                                                                                                                                                                                                                                                  |          |
|----|------------------------------------------------------------------------------------------------------------------------------------------------------------------------------------------------------------------------------------------------------------------|----------|
| 6  | 1 or 2 or 3 or 4 or 5                                                                                                                                                                                                                                            | 392093   |
| 7  | exp Adult/                                                                                                                                                                                                                                                       | 11110912 |
| 8  | exp Aged/                                                                                                                                                                                                                                                        | 3729387  |
| 9  | exp "Aged, 80 and over"/                                                                                                                                                                                                                                         | 207051   |
| 10 | exp Middle Aged/                                                                                                                                                                                                                                                 | 2180061  |
| 11 | (aged or elder* or adult*).mp. [mp=title, abstract, heading word, drug trade name, original title, device manufacturer, drug manufacturer, device trade name, keyword, floating subheading word, candidate term word]                                            | 12258291 |
| 12 | 7 or 8 or 9 or 10 or 11                                                                                                                                                                                                                                          | 12258331 |
| 13 | exp Feces/                                                                                                                                                                                                                                                       | 95973    |
| 14 | (stool or f?eces or f?ecal).mp. [mp=title, abstract, heading word, drug trade name, original title, device manufacturer, drug manufacturer, device trade name, keyword, floating subheading word, candidate term word]                                           | 311211   |
| 15 | ((stool or f?eces or f?ecal) adj3 (analysis or sample* or specimen*)).mp. [mp=title, abstract, heading word, drug trade name, original title, device manufacturer, drug manufacturer, device trade name, keyword, floating subheading word, candidate term word] | 95040    |
| 16 | 13 or 14 or 15                                                                                                                                                                                                                                                   | 311211   |
| 17 | exp Diagnosis/                                                                                                                                                                                                                                                   | 8393516  |
| 18 | exp "Diagnostic Techniques and Procedures"/                                                                                                                                                                                                                      | 8393516  |

|    |                                                                                                                                                                                                                                      |          |
|----|--------------------------------------------------------------------------------------------------------------------------------------------------------------------------------------------------------------------------------------|----------|
| 19 | exp "Sensitivity and Specificity"/                                                                                                                                                                                                   | 474829   |
| 20 | diagnos*.mp.                                                                                                                                                                                                                         | 7898663  |
| 21 | (diagnos* adj3 (accuracy or performance)).mp. [mp=title, abstract, heading word, drug trade name, original title, device manufacturer, drug manufacturer, device trade name, keyword, floating subheading word, candidate term word] | 7898663  |
| 22 | 17 or 18 or 19 or 20 or 21                                                                                                                                                                                                           | 23174442 |
| 23 | 6 and 12 and 16 and 22                                                                                                                                                                                                               | 954      |

**Database: Web of Science (Search date: March 10, 2023)**

| # | Searches                                                                       | Results |
|---|--------------------------------------------------------------------------------|---------|
| 1 | TS=(Mycobacterium tuberculosis OR MTB OR mycobacterium tuberculosis complex)   | 85791   |
| 2 | TS=(TB or PTB or pulmonary tuberculosis or lung tuberculosis)                  | 139341  |
| 3 | #2 OR #1                                                                       | 190871  |
| 4 | TS=(aged or elder* or adult*)                                                  | 5671293 |
| 5 | TS=(stool or f\$eces or f\$ecal)                                               | 207449  |
| 6 | TS=((stool or f\$eces or f\$ecal) NEAR/3 (analysis or sample* or specimen* ) ) | 53111   |
| 7 | #6 OR #5                                                                       | 207449  |
| 8 | TS=diagnos*                                                                    | 3279053 |
| 9 | TS=(diagnos* NEAR/3 (accuracy or performance) )                                |         |

|    |                          |         |
|----|--------------------------|---------|
|    |                          | 121227  |
| 10 | #9 OR #8                 | 3279053 |
| 11 | #10 AND #7 AND #4 AND #3 | 144     |

### Cochrane database (Search date: March 10, 2023)

| #  | Searches                                                                           | Results |
|----|------------------------------------------------------------------------------------|---------|
| 1  | (Mycobacterium tuberculosis OR MTB OR mycobacterium tuberculosis complex):ti,ab,kw | 1525    |
| 2  | (TB OR PTB OR pulmonary tuberculosis OR lung tuberculosis):ti,ab                   | 6546    |
| 3  | (aged OR elder* OR adult*):ti,ab,kw                                                | 1151590 |
| 4  | (stool OR f*eces OR f*ecal):ti,ab,kw                                               | 23025   |
| 5  | (stool OR f*eces OR f*ecal NEXT analysis OR sample* OR specimen*):ti,ab,kw         | 194603  |
| 6  | (diagnos*):ti,ab,kw                                                                | 287053  |
| 7  | (diagnostic NEXT accuracy OR performance):ti,ab,kw                                 | 129788  |
| 8  | #6 OR #7                                                                           | 390185  |
| 9  | #1 OR #2                                                                           | 7020    |
| 10 | #4 OR #5                                                                           | 198512  |
| 11 | #3 AND #8 AND #9 AND #10                                                           | 389     |
