# Supplementary material
Source: HighWire-hosted journal article supplement (https://bmjopen.bmj.com/content/13/4/e062135)
Supplement: inline-supplementary-material-2 [file inline-supplementary-material-2.pdf]

Supplementary table 1: Characteristics of the included studies

| Study                 | Country                      | Study design                | No of participants* | Age in years (median/mean) | HIV status (% HIV +ve) | Specimen type for reference standard | Reference standard                      | Index test/s                                        | Type of culture media used for reference/index test      |
|-----------------------|------------------------------|-----------------------------|---------------------|----------------------------|------------------------|--------------------------------------|-----------------------------------------|-----------------------------------------------------|----------------------------------------------------------|
| Kokuto 2015 (30)      | Japan                        | Retrospective case control  | 93                  | Median: 59.6               | 0%                     | Sputum                               | Culture or molecular diagnostics (TRC)  | Culture, Microscopy, Xpert MTB/RIF                  | MGIT, 2% Ogawa                                           |
| Konno 2019 (31)       | Japan                        | Retrospective investigation | 187                 | Mean: 74                   | 3.7%                   | Sputum                               | Culture, or microscopy                  | Culture, Microscopy, TRC Rapid                      | MGIT, 2% Ogawa                                           |
| Liu 2019 (32)         | China                        | Cross sectional             | 65                  | Median: 42                 | Not reported           | Transtracheal aspirate sputum        | Culture                                 | Xpert MTB/RIF                                       | MGIT                                                     |
| Oramasionwu 2013 (33) | Cambodia, Thailand, Viet Nam | Cross sectional             | 94**                | Median: 29                 | 100%                   | Sputum                               | Culture                                 | Culture                                             | Lowenstein Jensen or BACTEC MGIT 960 or BACTEC 9050/9120 |
| Rahman 2018 (34)      | Bangladesh                   | Case control                | 102                 | Mean: 33.4 (PTB)           | Not reported           | Sputum                               | Culture                                 | Culture, Microscopy, Xpert MTB/RIF                  | Lowenstein Jensen                                        |
| Abaye 2017 (35)       | Ethiopia                     | Cross sectional             | 117                 | Mean: 34.5                 | 100%                   | Sputum                               | Culture                                 | Culture, Microscopy, Region of Difference (RD)9-PCR | Lowenstein Jensen                                        |
| DiNardo 2018 (36)     | Swaziland                    | Cross sectional             | 106                 | Median: 32                 | 68% (PTB)              | Sputum (expectorate /induced)        | Culture                                 | Quantitative PCR (qPCR)                             | Middlebrook 7H9                                          |
| Musisi 2022 (37)      | Uganda                       | Cross sectional             | 100                 | Median: 34                 | 35%                    | Sputum                               | Culture                                 | Culture, Microscopy, Xpert ultra, TB-MBLA           | MGIT, Lowenstein Jensen                                  |
| ElKhechine 2009 (38)  | France                       | Cross sectional             | 134                 | Mean: 37 (PTB)             | Not reported           | Sputum                               | Culture or microscopy and real-time PCR | Culture, Microscopy, IS6110 PCR                     | BACTEC, Lowenstein Jensen                                |

\*Implied only bacteriologically confirmed positive PTB or negative TB cases; \*\* excluded cases with positive culture on both sputum and non-stool extrapulmonary sample
