# Supplementary material
Source: HighWire-hosted journal article supplement (https://bmjopen.bmj.com/content/13/4/e062135)
Supplement: inline-supplementary-material-3 [file inline-supplementary-material-3.pdf]

**Supplementary table 2: Diagnostic accuracy results**

| Test type              | Study                 | Sensitivity [95% CI] | Specificity [95% CI] |
|------------------------|-----------------------|----------------------|----------------------|
| <b>Culture</b>         | Kokuto 2015a (30)     | 21.4 [11.6-34.4]     | 100 [89.4-100]       |
|                        | Kokuto 2015b (30)     | 31.9 [19.1-47.1]     | 100 [88-100]         |
|                        | Konno 2019 (31)       | 44.2 [36.4-52.1]     | 83.3 [62.6-95.3]     |
|                        | Oramasionwu 2013 (33) | 53.2 [42.6-63.6]     | *                    |
|                        | Rahman 2018 (34)      | 35.3 [26.1-45.4]     | **                   |
|                        | Abaye 2017 (35)       | 30.3 [15.6- 48.7]    | 96.4 [89.9-99.3]     |
|                        | Musisi 2022a (37)     | 63.9 [50.6-75.8]     | 61.5% [44.6-76.6]    |
|                        | Musisi 2022b (37)     | 44.3 [31.5-57.6]     | 79.5 [63.5-90.7]     |
|                        | ElKhechine 2009 (38)  | 54.2 [32.8-74.4]     | 100 [96.7-100]       |
| <b>AFB Microscopy</b>  | Kokuto 2015 (30)      | 47.3 [33.7-61.2]     | 94.6[81.8-99.3]      |
|                        | Konno 2019 (31)       | 21.1 [14-29.7]       | 100 [95.1-100]       |
|                        | Rahman 2018 (34)      | 53.9 [43.8-63.8]     | *                    |
|                        | Abaye 2017 (35)       | 12.1 [3.4-28.2]      | 100 [95.7-100]       |
|                        | Musisi 2022 (37)      | 45.9 [33.1-59.2]     | 79.5 [63.5-90.7]     |
|                        | ElKhechine 2009 (38)  | 37.5 [18.8-59.4]     | 100 [96.7-100]       |
| <b>Xpert MTB/RIF</b>   | Kokuto 2015 (30)      | 85.7 [73.8-93.6]     | 100 [90.5-100]       |
|                        | Liu 2019 (32)         | 90.6 [75-98]         | 93.9 [79.8-99.3]     |
|                        | Rahman 2018 (34)      | 90.2 [82.7-95.2]     | *                    |
| <b>Xpert Ultra</b>     | Musisi 2022 (37)      | 83.6 [71.9-91.8]     | 87.2 [72.6-95.7]     |
| <b>Other PCR assay</b> | Konno 2019 (31)       | 84.2 [75.3-90.9]     | 69.8 [53.9-82.8]     |
|                        | Abaye 2017 (35)       | 69.7 [51.3-84.4]     | 94 [86.7-98]         |
|                        | DiNardo 2018 (36)     | 70.1 [59.4-79.5]     | 78.9 [54.4-93.9]     |
|                        | Musisi 2022 (37)      | 80.3 [68.2-89.4]     | 79.5 [63.5-90.7]     |
|                        | ElKhechine 2009 (38)  | 100 [85.8-100]       | 97.3 [92.2-99.4]     |

\*not reported; \*\*non-TB healthy controls were not microbiologically confirmed. Therefore, we did not include specificity results
