# Supplementary material
Source: HighWire-hosted journal article supplement (https://bmjopen.bmj.com/content/13/4/e062135)
Supplement: inline-supplementary-material-4 [file inline-supplementary-material-4.pdf]

## Supplementary file 2: Stool sample collection, storage and processing in the included studies

| Study                 | Timing of stool collection relative to start anti-TB treatment | Stool sample collected per participant | Stool volume      | Stool storage prior to processing | Stool processing method                          |                              |                |                    |
|-----------------------|----------------------------------------------------------------|----------------------------------------|-------------------|-----------------------------------|--------------------------------------------------|------------------------------|----------------|--------------------|
|                       |                                                                |                                        |                   |                                   | Pretreatment, decontamination and neutralization | Homogenization process       | Centrifugation | Filtration         |
| Kokuto 2015 (30)      | < 7 days                                                       | 1                                      | 2 cm <sup>3</sup> | Not reported                      | distilled water, 3% NACL-NaOH, PBS               | vortex mixing                | Yes            | Not reported       |
| Konno 2019 (31)       | Not reported                                                   | 1                                      | 100 – 200 µl      | Not reported                      | semi alkaline proteinase, NALC-NaOH, PBS         | Not reported                 | Yes            | Not reported       |
| Liu 2019 (32)         | Prior to treatment                                             |                                        | 1gm               | Not reported                      | PBS, sample reagent                              | vortex mixing                | Not reported   | Not reported       |
| Oramasionwu 2013 (33) | Prior to treatment                                             | 1                                      | 1 gm              | Not reported                      | sterile water, 1% NACL-NaOH, PBS                 | emulsifying with glass beads | Yes            | Yes, sterile gauze |
| Rahman 2018 (34)      | Not reported                                                   | 1                                      | 2 gm              | -20° C                            | sterile normal saline, NALC-NaOH-Na-citrate, PBS | vortex mixing                | Yes, twice     | Not reported       |

| Study                | Timing of stool collection relative to start anti-TB treatment | Stool sample collected per participant | Stool volume | Stool storage prior to processing | Stool processing method                                   |                                                |                |                          |
|----------------------|----------------------------------------------------------------|----------------------------------------|--------------|-----------------------------------|-----------------------------------------------------------|------------------------------------------------|----------------|--------------------------|
|                      |                                                                |                                        |              |                                   | Pretreatment, decontamination and neutralization          | Homogenization process                         | Centrifugation | Filtration               |
| Abaye 2017 (35)      | Prior to treatment                                             | 1                                      | 1 gm         | 4° C                              | NALC-NaOH, Tris buffer, 1% chlorhexidine digluconate, PBS | Emulsifying with glass beads and vortex mixing | Yes            | Yes                      |
| DiNardo 2018 (36)    | Median of 5 days (0-14)                                        | 1                                      | 50 mg        | -80° C                            | MP Fast DNA soil kit                                      | Bead-beating                                   | Not reported   | Not reported             |
| Musisi 2022 (37)     | Not reported                                                   | 1                                      | 12 gm        | -20° C                            | OM-S, PBS                                                 | Not reported                                   | Yes            | Not reported             |
| ElKhechine 2009 (38) | Prior to treatment                                             | Not reported                           | Not reported | Not reported                      | Tris buffer, PBS, 1% chlorhexidine digluconate            | Vortex mixing                                  | Yes            | Yes, filtration vial kit |

NALC-NaOH: N-acetyl-L-cysteine-sodium hydroxide; PBS: Phosphate buffer solution; NALC-NaOH-Na-citrate: N-acetyl-L-cysteine (NALC)-NaOH-Na-citrate solution (0.5% NALC, 4% NaOH, and 2.94% Na-citrate); OM-S: OMNIgene-sputum reagent
